# Supplementary material for: Scalable and sustainable N-Si-Ge-Te Ovonic threshold switching devices for energy-efficient artificial neuron applications
Source: Research Square preprint supplement (doi:10.21203/rs.3.rs-7764312/v1), 2025-12-24
Supplement: Supplementary file 1 [file a903f2e176c4ed22d0c5d8d6.docx]

**Supplementary Information**

**Scalable and sustainable N-Si-Ge-Te Ovonic threshold switching devices for energy-efficient artificial neuron applications**

Park et al.

*e-mail: [jongsoukyeo@yonsei.ac.kr](mailto:jongsoukyeo@yonsei.ac.kr)

**Table of Contents**

**Supplementary Table T1** **| Comparative table for the state-of-the-art device performances 3**

**Supplementary Table T2 |** **Comparative performance table of state-of-the-art artificial neuron devices 3**

**Supplementary Table T3 | Deconvoluted peaks from Raman spectra 4**

**Supplementary Figure S1 | Device fabrication process and top view of fabricated device 5**

**Supplementary Figure S2 | Device-to-device variation of DC I-V characteristics 6**

**Supplementary Figure S3 | Delay time measurement 7**

**Supplementary Figure S4 | X-ray photoelectron spectroscopy (XPS) spectra and deconvoluted peaks 8**

**Supplementary Figure S5 | Radial distribution function (RDF) 9**

**Supplementary Figure S6 | Density of states (DoS) from –16 eV to 12 eV (eV) 10**

**Supplementary Figure S7 | Bond angle distribution for Ge-related bonds 11**

**Supplementary Figure S8 | Spiking characteristic of artificial NSGT-based neuron depending on synapse resistor 12**

**Supplementary Method C1 | Calculating Tg based on Lankhorst’s model 13**

**Supplementary Information**

| **Composition** | **Feature size (nm)** | **Device area (cm2)** | **Ioff  (A)** | **Joff (MA/cm2)** | **Tx  (°C)** |
| --- | --- | --- | --- | --- | --- |
| **Si-Te (This Work)** | 5000 | 2.5∙10-7 | 6.0∙10-5 | **2.4∙10-4** | **400** |
| **Si-Ge-Te (This Work)** | 5000 | 2.5∙10-7 | 5.29∙10-6 | **2.1∙10-5** | **300** |
| **N-Si-Ge-Te (This Work)** | 5000 | 2.5∙10-7 | 5.8∙10-9 | **2.3∙10-8** | **400** |
| Si-Te1 | 100 | 10-10 | 8.0∙10-10 | 8.0∙10-6 | - |
| Zn-Te2 | 200 | 4.0∙10-10 | 6.0∙10-6 | 1.5∙10-2 | - |
| C-Te3 | 30 | 9.0∙10-12 | 5.0∙10-9 | 5.5∙10-4 | 450 |
| B-Te3 | 30 | 9.0∙10-12 | 10-8 | 1.1∙10-3 | 450 |
| Ge-S4 | 130 | 1.7∙10-10 | 10-9 | 5.9∙10-6 | 350 |
| N-Si-Te-As-Ge5 | 30 | 9.0∙10-12 | 10-6 | 1.1∙10-1 | 600 |
| Si-Te-As-Ge-Sb6 | 350 | 1.2∙10-9 | 1.9∙10-9 | 1.6∙10-6 | 350 |
| Ge-Se7 | 50 | 2.5∙10-11 | 10-6 | 4.0∙10-2 | 350 |
| Ge-Se-Si8 | 200 | 4.0∙10-10 | 2.0∙10-7 | 5.0∙10-4 | - |
| Ge-Se-As9 | 350 | 1.2∙10-9 | 10-8 | 8.3∙10-6 | 450 |
| Ge-Se-N10 | 50 | 2.5∙10-11 | 2.0∙10-9 | 8.0∙10-5 | 600 |
| GSSN11 | 350 | 1.2∙10-9 | 10-10 | 8.3∙10-8 | 400 |

**Supplementary Table T1:** Comparative performance table of state-of-the-art selector devices.1-11

| **Composition** | **Device area (um2)** | **Energy (pJ/spike)** | **Normalization  (pJ/um2)** | **Frequency  (MHz)** |
| --- | --- | --- | --- | --- |
| **N-Si-Ge-Te (This Work)** | 25 | **14** | **0.56** | **1.4-8.6** |
| Ge-Se12 | 100 | 1000 | 10 | 0.1-100 |
| NbOx13 | 0.0007069 | 50 | 70740.4 | 0.01-0.1 |
| B-Te13 | 0.0007069 | 30 | 42444.2 | 0.01-0.1 |
| Ag/HfO213 | 0.04909 | 20 | 407.3 | 0.01-0.1 |
| NbOx14 | 25 | 50 | 2 | 0.1-1 |
| ZnO15 | 100 | 1.442 | 14.42 | 0.00030-0.000185 |
| WSe216 | 0.2 | 2.26 | 11.30 | 1.77 |
| MOSFET17 | 0.25 | 10 | 40.00 | 0.00002 |
| SONOS18 | 0.25 | 30 | 120.00 | 3 |
| PD-SOI19 | 1.8 | 35 | 19.44 | 20 |
| PCM20 | 0.5 | 5 | 10 | 0.05 |

**Supplementary Table T2:** Comparative performance table of state-of-the-art artificial neuron devices.12-20

| **System** |  | **Peak A** | **Peak B** | **Peak C** | **Peak D** | **Peak E** | **Peak G** |
| --- | --- | --- | --- | --- | --- | --- | --- |
| **ST** | 1/(cm-1) | 88.50 | 103.00 |  | 122.10 | 139.30 | 160.00 |
| Area% | 5.97% | 4.43% |  | 55.03% | 27.69% | 6.89% |
| **SGT** | 1/(cm-1)\ | 88.50 | 103.00 | 120.00 | 123.30 | 138.50 | 154.20 |
| Area% | 4.50% | 7.19% | 18.79% | 32.91% | 19.85% | 16.75% |
| **NSGT** | 1/(cm-1) | 91.290 | 100.40 | 120.80 | 123.90 | 140.40 | 153.00 |
| Area% | 4.10% | 5.28% | 21.58% | 41.43% | 17.31% | 10.31% |

**Supplementary Table T3:** Deconvoluted peaks from Raman spectra of ST, SGT, and NSGT. Peak A, B, D and E correspond to Te-Te bonds. Peak C corresponds to Ge-Te units in SGT and NSGT. Peak G is related with Si-Te units.


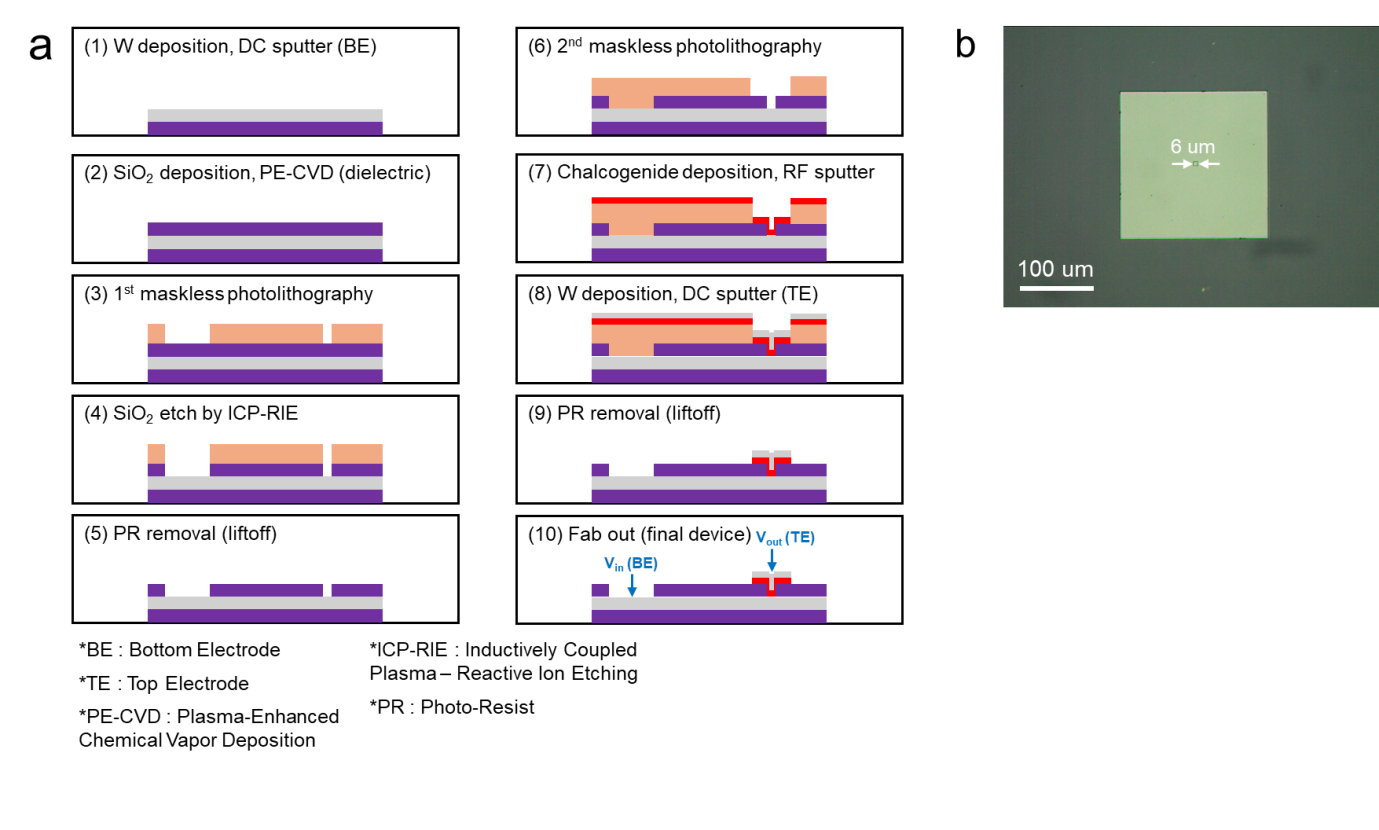


**Supplementary Fig. S1 |** Device fabrication process and top view of fabricated device. **a,** Schematic of the single OTS selector’s fabrication procedure from a bare SiO2 wafer to the final device. The purple substrate represents the SiO2 wafer, the orange film represents the photoresist (AZ5214E), the red film represents the chalcogenide film, and the grey film represents tungsten electrode. **b,** Optical microscope image of the top view of the fabricated device.

**
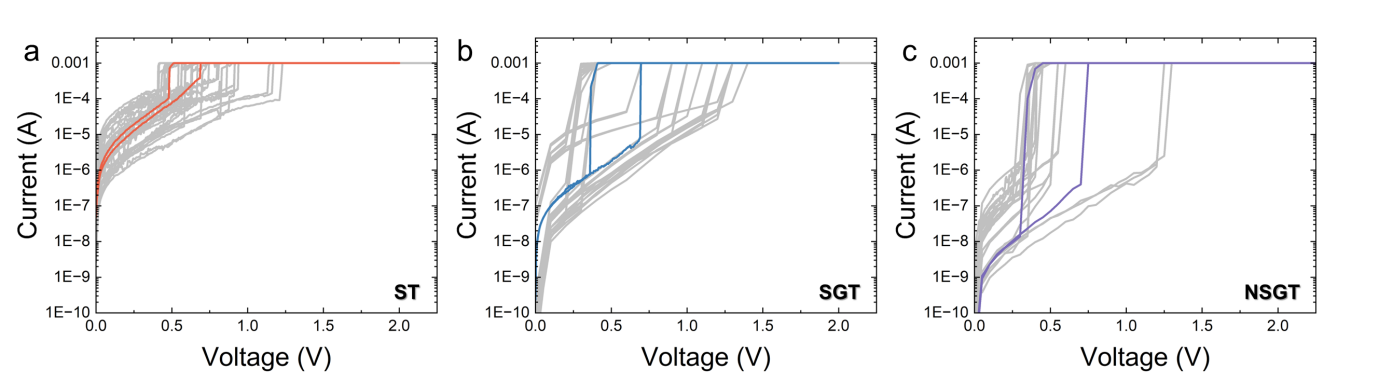
**

**Supplementary Fig. S2 |** Device-to-device variation of DC I-V characteristicsof **a,** ST**, b,** SGT, and **c,** NSGTdevices.

**
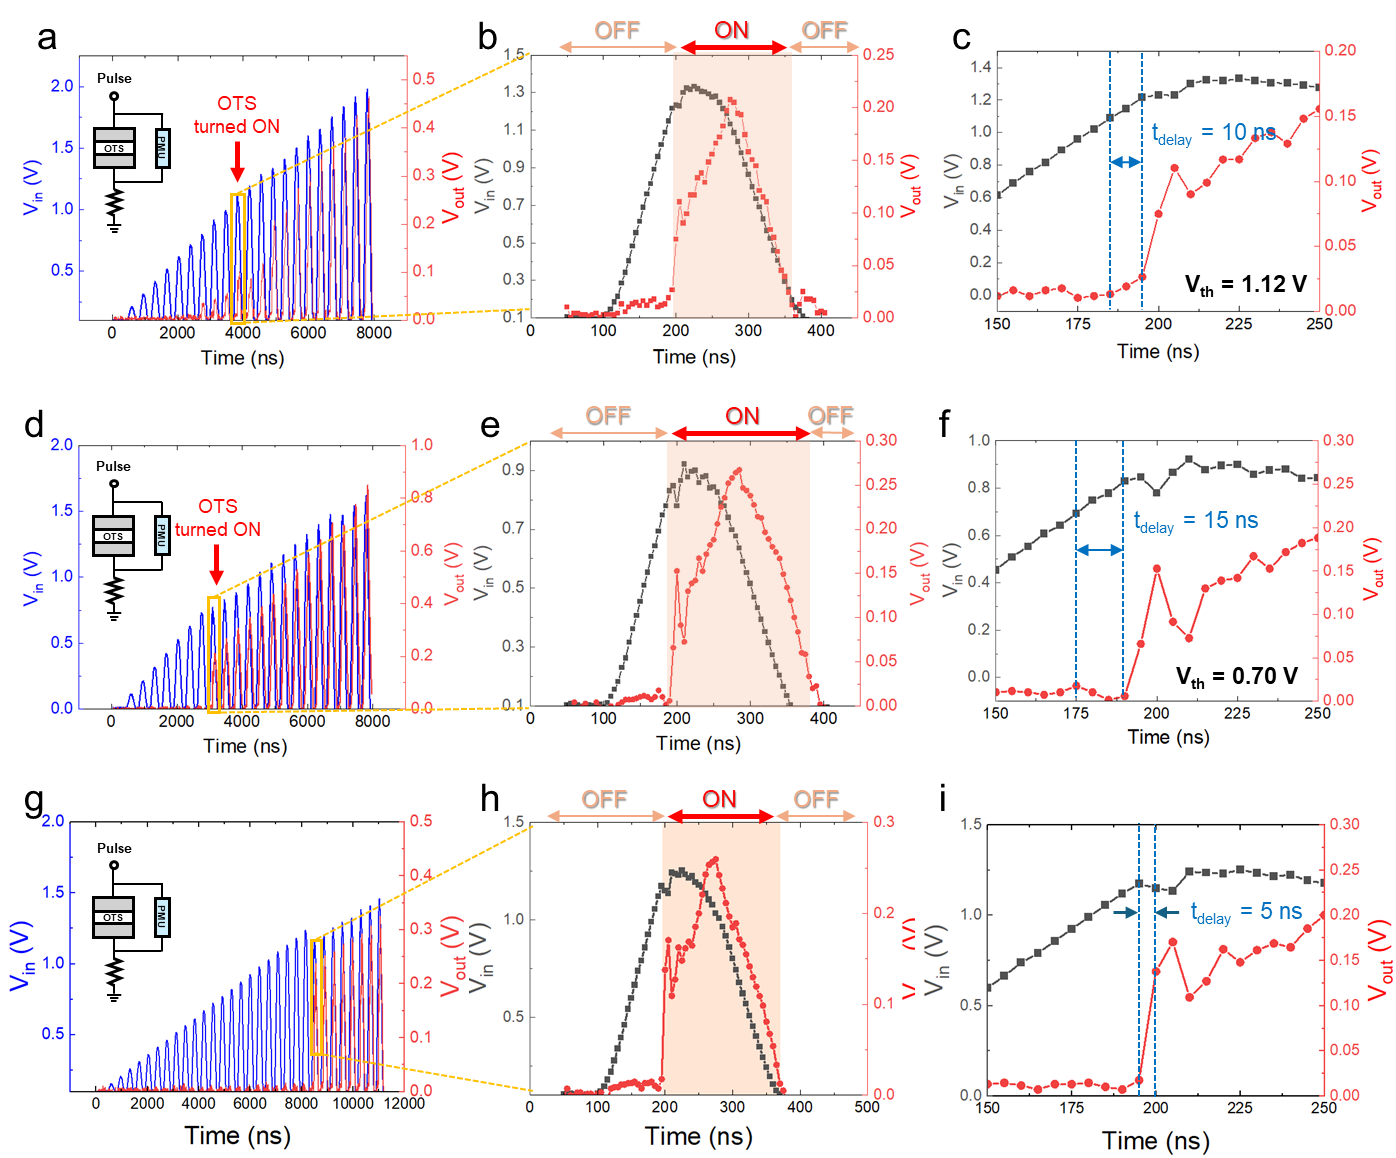
**

**Supplementary Fig. S3 |** Delay time measurements of ST, SGT, and NSGT OTS selectors.OTS selector’s response to trapezoidal voltage pulse train with increasing pulse amplitudes with **a,** binary ST (0.1 V~2.0 V), **d,** ternary SGT (0.1 V~1.5 V), and **g,** quaternary NSGT (0.1 V~1.2 V) devices, with an equivalent test circuit shown in the inset. Enlarged views of the first device response with input pulse and output device response showing discrete on/off states in **b,** ST, **e,** SGT, and **h,** NSGT. Enlarged views of the panels b,e, and h for delay time evaluation, highlighting the device response to Vth and the corresponding rise in Vout. **c,** ST (td=10 ns), **f,** SGT (td=15 ns), and **i,** NSGT (td=5 ns).


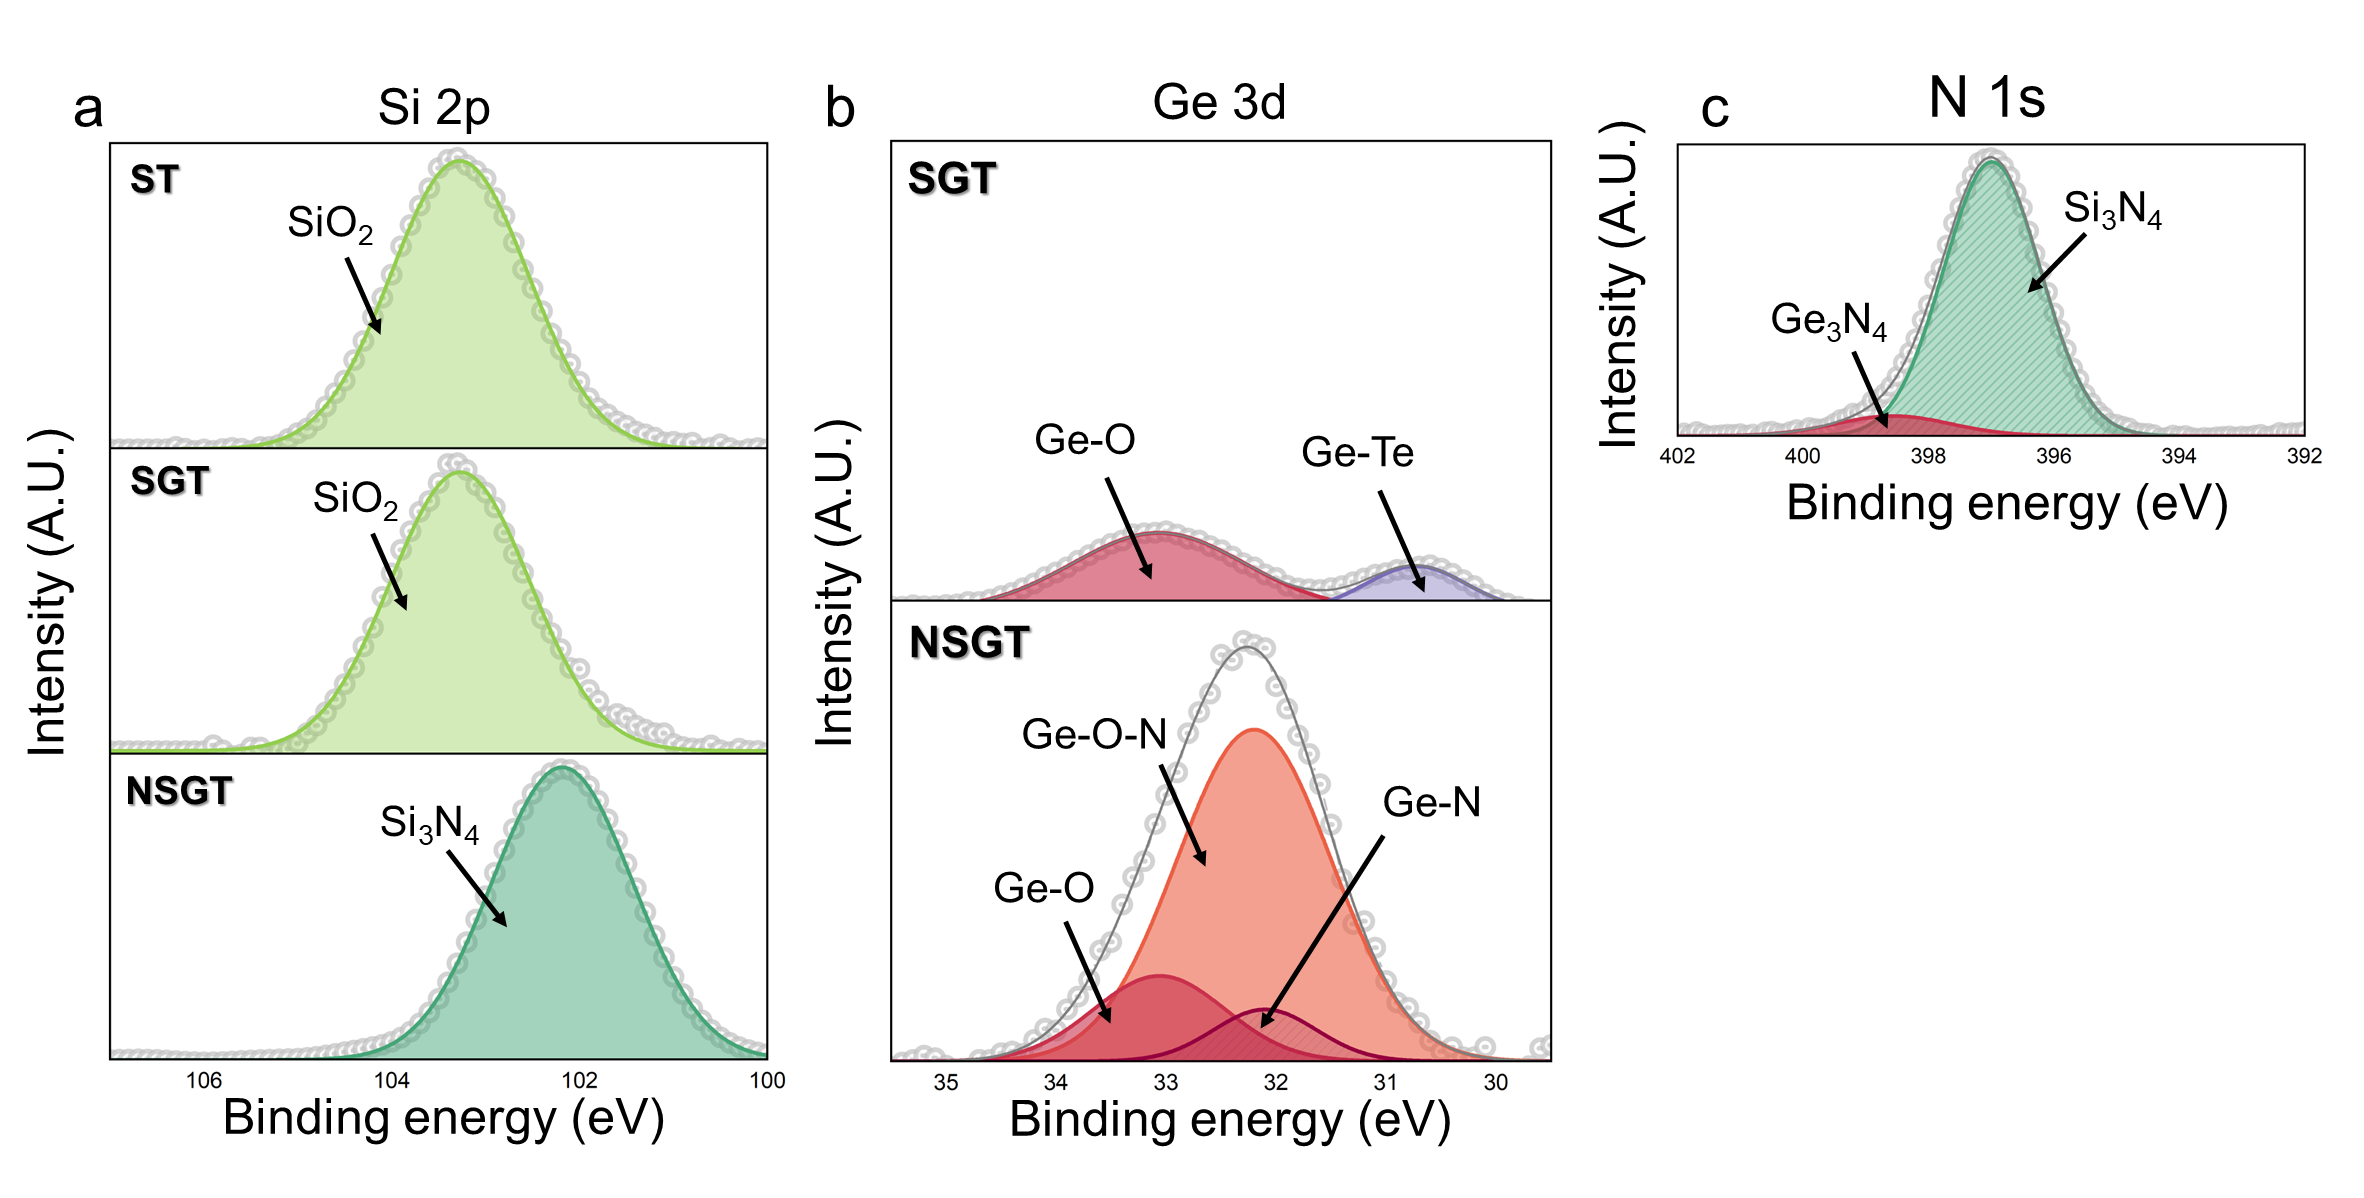


**Supplementary Fig. S4 |** X-ray photoelectron spectroscopy (XPS) spectra and deconvoluted spectral peaks for **a,** Si 2p**, b,** Ge 3d and **c,** N 1s. In SGT, the Ge–O bond was commonly detected in both the Ge 3d21,22. In NSGT, N-related bonds were formed with Si and Ge. The Si–N bond was consistently observed in the Si 2p23 and N 1s regions23, while the Ge–N bond was commonly identified in the Ge 3d and N 1s24 regions.


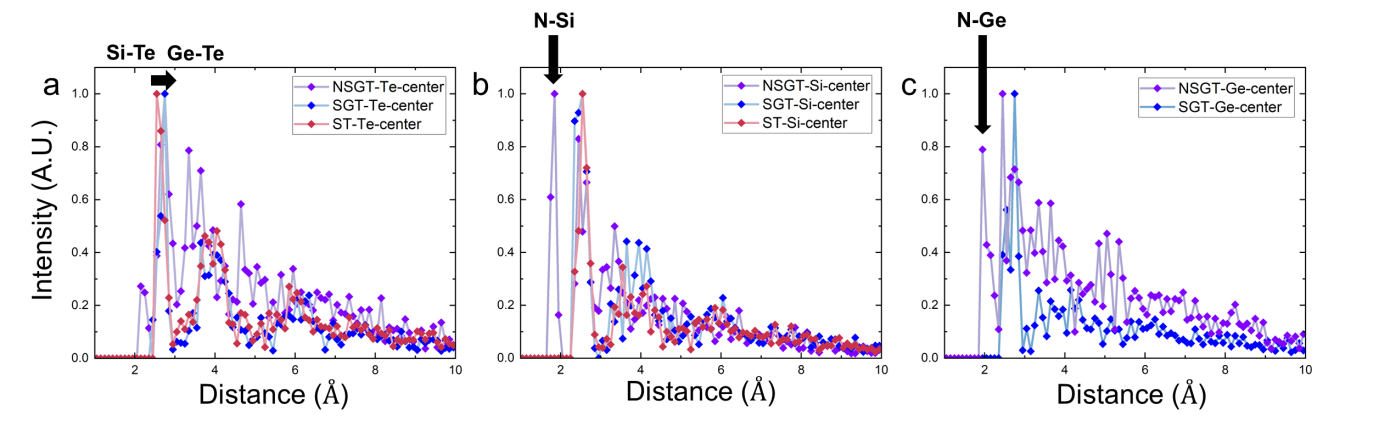


**Supplementary Fig. S5 |** Radial distribution function (RDF) of **a,** ST**, b,** SGT, and **c,** NSGT. Prominent peaks corresponding to the dominant bonds are observed, with the appearance of a peak associated with the Ge–Te bond length induced by Ge-doping, and additional shorter bond-length peaks arising from N-doping. All RDF results are calculated using the ASE Python library from amorphous structural models.


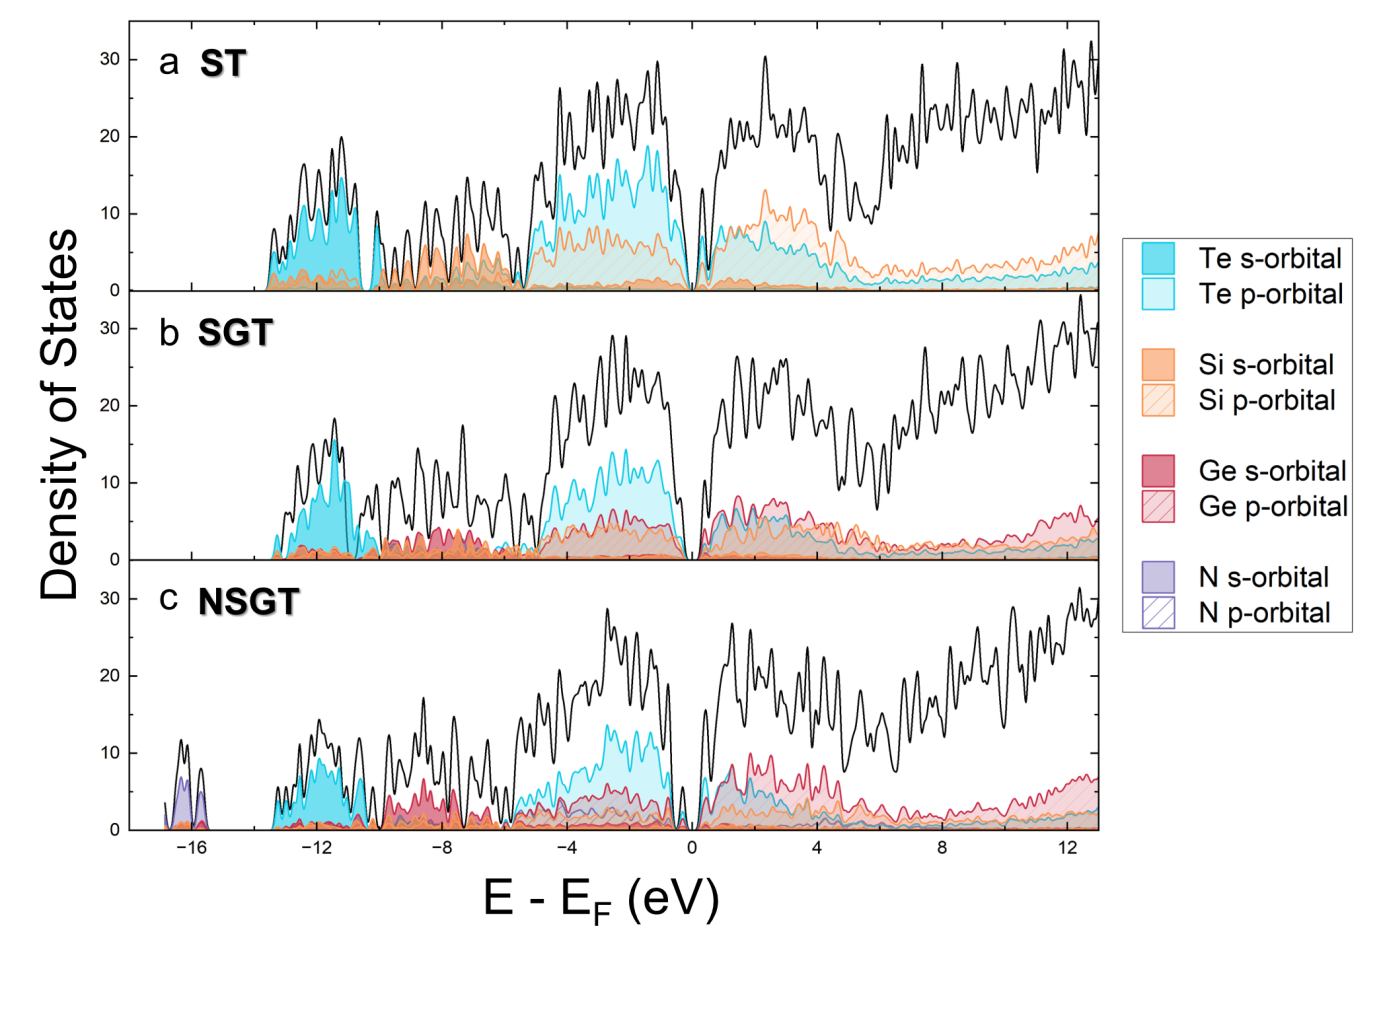


**Supplementary Fig. S6 |** Density of states (DoS) from –16 eV to 12 eV (eV) **a,** ST**, b,** SGT**,** and **c,** NSGT**.** In all three materials, the Te p-orbitals dominate near the band edges, while the Te s-orbitals are located in deep-lying states.


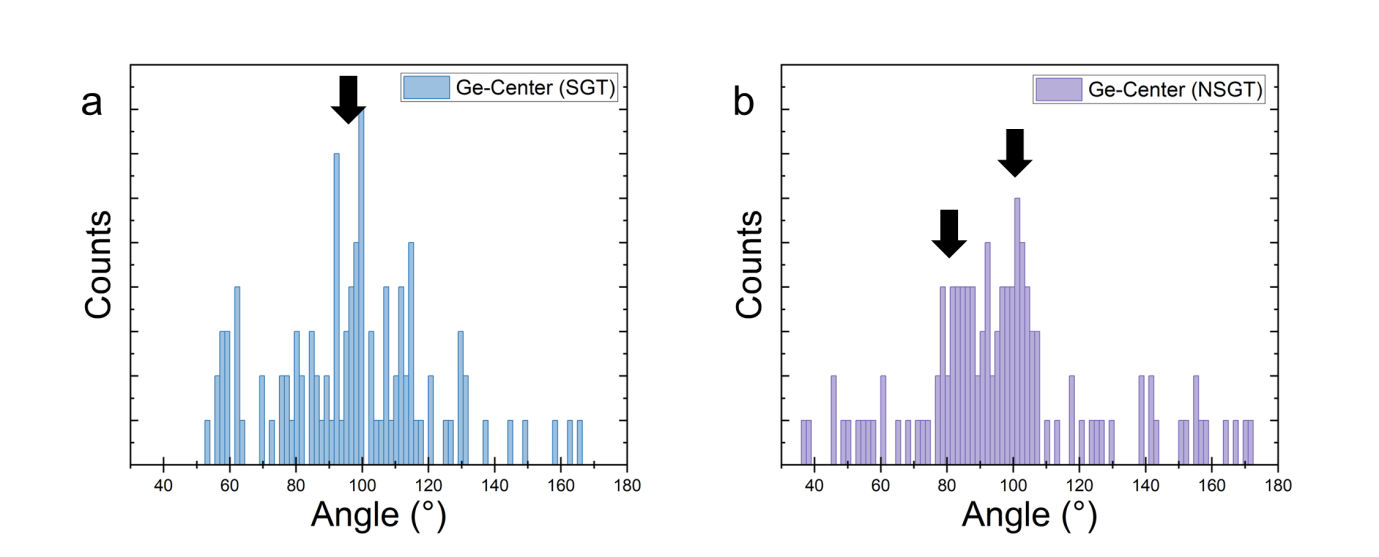


**Supplementary Fig. S7 |** Bond angle distributions for Ge-related bonds in **a,** SGTand **b,** NSGT**.** In the amorphous SGT structural model, the bond angles of Ge–Te bonds are centered on Ge around 100°. After N-doping, this distribution shifts to 80° and 110°, indicating distortion of the Ge–Te structure.


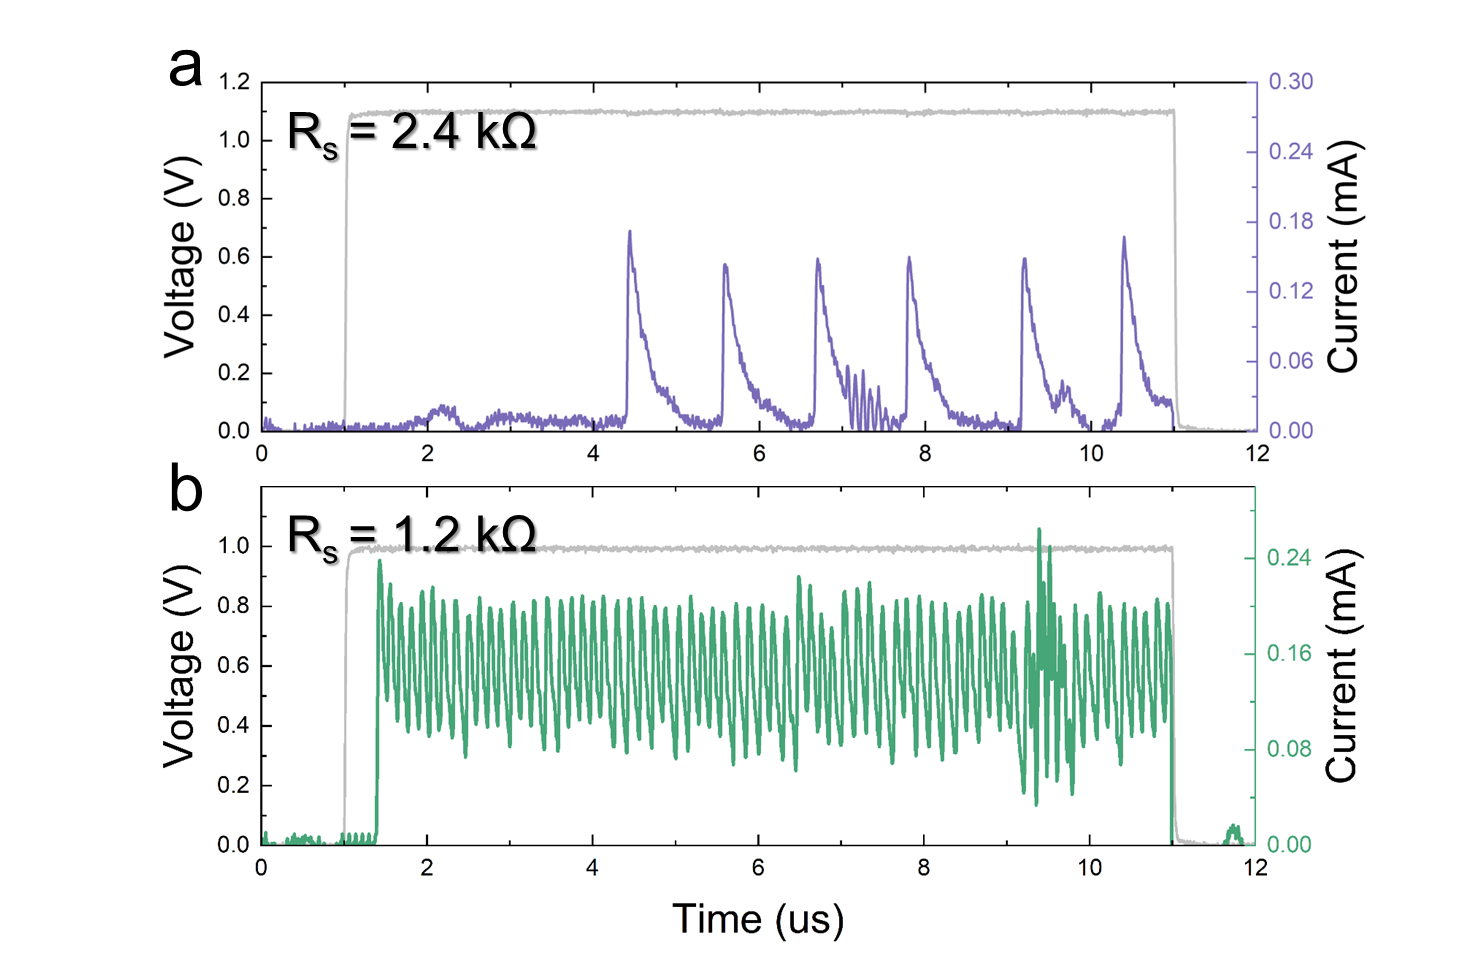
**Supplementary Fig. S8 |** Spiking characteristics of artificial NSGT-based neuron depending on synapse resistor, **a**, Rs = 2.4 k Ω and **b**, 1.2 k Ω. (with identical load resistance RL = 10 kΩ) An increase in resistance resulted in a decrease in spiking frequency.

**Supplementary Method C1** | Computation ofglass transition temperature (Tg) based on Lankhorst’s model

The Tg for a binary chalcogenide system A₁₋xBₓ is determined through the following steps:

1. The constituent elements and their relative composition ratios are calculated.
2. The dominant element in terms of compound composition, , where represents the coordination number of element is identified as follows:
3. The bond concentration around this dominant element is determined as follows:
   1. If 0 < < , A-rich system:
   2. If , < < 1, B-rich system:
4. The heterogeneous bond enthalpy is computed as:
5. The atomization enthalpy is calculated as:
6. The glass-transition temperature TgT is estimated using Lankhorst’s equation:

Major bond enthalpies for homopolar and heteropolar bonds in ST, SGT, and NSGT are summarized in Table a, and the calculated Tg based on the Lankhorst model and the measured crystallization temperature (Tx) are presented in Table b.

**
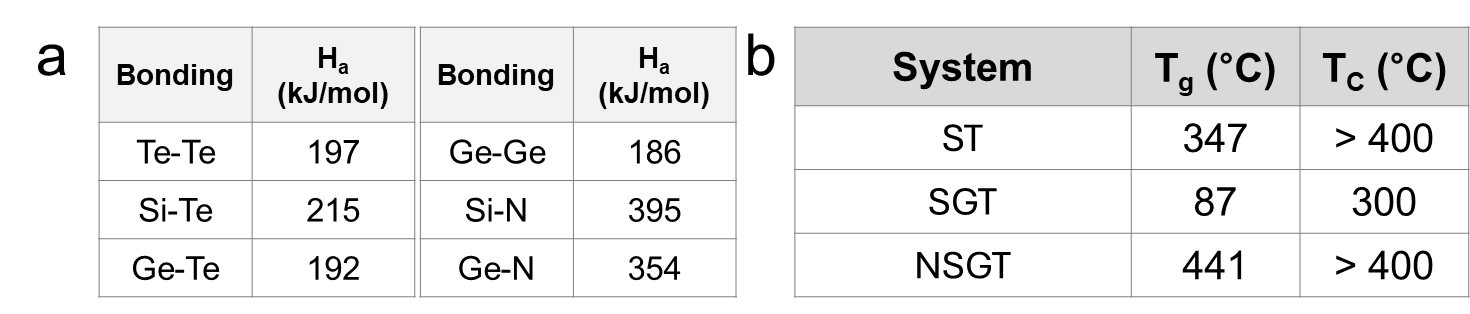
**

**Supplementary References**

1 Koo, Y., Lee, S., Park, S., Yang, M. & Hwang, H. Simple binary ovonic threshold switching material SiTe and its excellent selector performance for high-density memory array application. *IEEE Electron Device Letters* **38**, 568-571 (2017).

2 Koo, Y. & Hwang, H. Zn1− xTex ovonic threshold switching device performance and its correlation to material parameters. *Scientific Reports* **8**, 11822 (2018).

3 Yoo, J. *et al.* 3D stackable and scalable binary ovonic threshold switch devices with excellent thermal stability and low leakage current for high‐density cross‐point memory applications. *Advanced Electronic Materials* **5**, 1900196 (2019).

4 Jia, S. *et al.* Ultrahigh drive current and large selectivity in GeS selector. *Nature Communications* **11**, 4636 (2020).

5 Lee, M.-J. *et al.* A plasma-treated chalcogenide switch device for stackable scalable 3D nanoscale memory. *Nature communications* **4**, 2629 (2013).

6 Cheng, H.-Y. *et al.* in *2017 IEEE International Electron Devices Meeting (IEDM).* 2.2. 1-2.2. 4 (IEEE).

7 Govoreanu, B. *et al.* in *2017 Symposium on VLSI Technology.* T92-T93 (IEEE).

8 Li, X., Yuan, Z., Lv, S., Song, S. & Song, Z. Extended endurance performance and reduced threshold voltage by doping Si in GeSe-based ovonic threshold switching selectors. *Thin Solid Films* **734**, 138837 (2021).

9 Cheng, H. *et al.* in *2018 IEEE International Electron Devices Meeting (IEDM).* 37.33. 31-37.33. 34 (IEEE).

10 Avasarala, N. S. *et al.* in *2018 IEEE Symposium on VLSI Technology.* 209-210 (IEEE).

11 Verdy, A. *et al.* in *2018 IEEE International Memory Workshop (IMW).* 1-4 (IEEE).

12 Lee, M. *et al.* Simple artificial neuron using an ovonic threshold switch featuring spike-frequency adaptation and chaotic activity. *Physical Review Applied* **13**, 064056 (2020).

13 Lee, D. *et al.* Various threshold switching devices for integrate and fire neuron applications. *Advanced Electronic Materials* **5**, 1800866 (2019).

14 Ding, Y. *et al.* Engineering spiking neurons using threshold switching devices for high-efficient neuromorphic computing. *Frontiers in neuroscience* **15**, 786694 (2022).

15 Wang, L., Zhang, L., Hua, S., Fu, Q. & Guo, X. Leaky integrate-and-fire and oscillation neurons based on ZnO diffusive memristors for spiking neural networks. *Science China Materials* **68**, 1212-1219 (2025).

16 Choi, H. *et al.* Spiking neural network integrated with impact ionization field‐effect transistor neuron and a ferroelectric field‐effect transistor synapse. *Advanced Materials* **37**, 2406970 (2025).

17 Han, J.-K. *et al.* Mimicry of excitatory and inhibitory artificial neuron with leaky integrate-and-fire function by a single MOSFET. *IEEE Electron Device Letters* **41**, 208-211 (2019).

18 Han, J.-K. *et al.* Cointegration of single-transistor neurons and synapses by nanoscale CMOS fabrication for highly scalable neuromorphic hardware. *Science Advances* **7**, eabg8836 (2021).

19 Dutta, S., Kumar, V., Shukla, A., Mohapatra, N. R. & Ganguly, U. Leaky integrate and fire neuron by charge-discharge dynamics in floating-body MOSFET. *Scientific reports* **7**, 8257 (2017).

20 Tuma, T., Pantazi, A., Le Gallo, M., Sebastian, A. & Eleftheriou, E. Stochastic phase-change neurons. *Nature nanotechnology* **11**, 693-699 (2016).

21 Robert, B., Flaud, V., Escalier, R., Mehdi, A. & Vigreux, C. XPS study of Ge-Se-Te surfaces functionalized with organosilanes. *Applied Surface Science* **607**, 154921 (2023).

22 Lan, W., Cao, L., Fu, Y., Fang, J. & Wang, J. Structure and optical properties of GeTe film controlled by amorphous to crystalline phase transition. *Vacuum* **197**, 110847 (2022).

23 Matsuoka, M., Isotani, S., Sucasaire, W., Zambom, L. d. S. & Ogata, K. Chemical bonding and composition of silicon nitride films prepared by inductively coupled plasma chemical vapor deposition. *Surface and Coatings Technology* **204**, 2923-2927 (2010).

24 Maeda, T. *et al.* Ge metal-insulator-semiconductor structures with Ge3N4 dielectrics by direct nitridation of Ge substrates. *Applied physics letters* **85**, 3181-3183 (2004).
